# Supplementary material for: Synthesis and characterization of a new layered compound of trimesic acidElectronic supplementary information (ESI) available: top view of the HxBTC anionic network (Fig. S1) and detailed hydrogen bond graph sets present in the interactions linking the two HxBTC sheets within a double layer (Fig. S2). See http://www.rsc.org/suppdata/nj/b1/b108083k/
Source: Royal Society of Chemistry journal article supplement (doi:10.1039/b108083k), 2002-02-27
Supplement: b108083k_s1.doc [file b108083k_s1.doc]

**
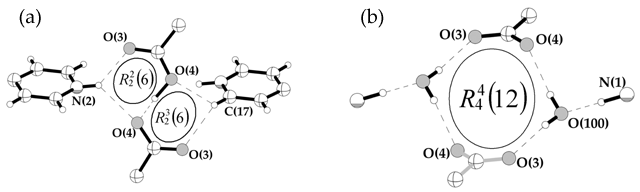
**

**Figure S1.** Top view of the HxBTC anionic network. The tapes show alternation between *R22(8)* and *R22(16)* graph sets. The latter can be considered as the conjunction of one *R22(10)* formed by two weak C–H···O hydrogen bonds, with two peripheral *R22(7)*. The holes between the tapes are best described by a *R66(40)* graph set. Hydrogen bonds within layers are represented by dotted lines.
