# Supplementary material for: Synthesis and characterization of a new layered compound of trimesic acidElectronic supplementary information (ESI) available: top view of the HxBTC anionic network (Fig. S1) and detailed hydrogen bond graph sets present in the interactions linking the two HxBTC sheets within a double layer (Fig. S2). See http://www.rsc.org/suppdata/nj/b1/b108083k/
Source: Royal Society of Chemistry journal article supplement (doi:10.1039/b108083k), 2002-02-27
Supplement: b108083k_s2.doc [file b108083k_s2.doc]

**
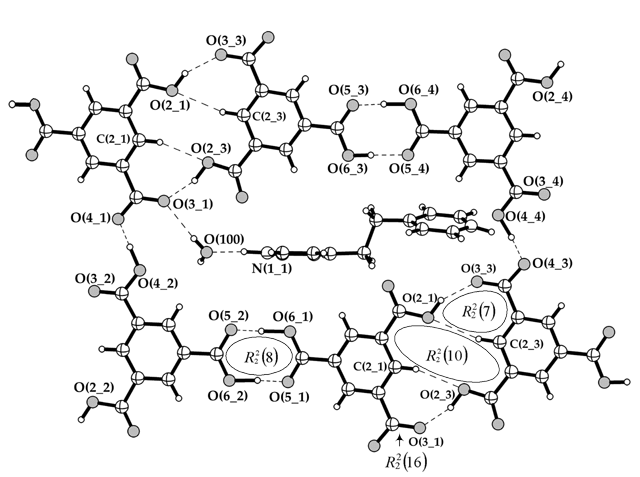
**

**Figure S2.** Detailed hydrogen bond graph sets present in the interactions linking the two HxBTC sheets within a double layer (see Fig. 2).
